# Supplementary material for: Genetic variability studies for tuber yield and yield attributes in Ethiopian released potato (Solanum tuberosum L.) varieties
Source: PeerJ. 2022 Feb 10;10:e12860. doi: 10.7717/peerj.12860 (PMC8841037; doi:10.7717/peerj.12860)
Supplement: Supplemental Information 1 [file peerj-10-12860-s001.xls]

## Sheet: RF
DOM	2016	2017	2018
2018-01-01	0	0	0
2018-01-02	0	0	0
2018-01-03	0	0	0
2018-01-04	0	0	0
2018-01-05	0	0	0
2018-01-06	0	0	0
2018-01-07	0	0	0
2018-01-08	0	0	0
2018-01-09	0	0	0
2018-01-10	0	0	0
2018-01-11	0	0	0
2018-01-12	0	0	0
2018-01-13	0	0	0
2018-01-14	0	0	0
2018-01-15	0	0	0
2018-01-16	0	0	0
2018-01-17	0	0	0
2018-01-18	0	0	0
2018-01-19	0	0	3
2018-01-20	0	0	2
2018-01-21	0	0	0
2018-01-22	0	0	0
2018-01-23	0	0	0
2018-01-24	0	0	0
2018-01-25	0	0	0
2018-01-26	0	0	0
2018-01-27	0	0	0
2018-01-28	0	0	0
2018-01-29	0	0	0
2018-01-30	0	0	0
2018-01-31	0	0	0
2018-02-01	0	0	0
2018-02-02	0	0	0
2018-02-03	0	0	0
2018-02-04	0	0	0
2018-02-05	0	0	0
2018-02-06	0	0	0
2018-02-07	0	0	0
2018-02-08	0	0	0
2018-02-09	0	0	0
2018-02-10	0	0	0
2018-02-11	0	0	0
2018-02-12	0	0	0
2018-02-13	0	0	3
2018-02-14	0	0	4
2018-02-15	0	7.6	6.2
2018-02-16	0	0	8.6
2018-02-17	0	0	13
2018-02-18	0	0	9.2
2018-02-19	0	0	10
2018-02-20	0	0	10
2018-02-21	0	0	0
2018-02-22	0	0	0
2018-02-23	0	0	0
2018-02-24	0	0	0
2018-02-25	15.2	0	0
2018-02-26	0	22.6	0
2018-02-27	0	0	0
2018-02-28	0	0	0
29-Feb	0
2018-03-01	0	0
2018-03-02	0	0
2018-03-03	0	0
2018-03-04	22.2	0
2018-03-05	0	0
2018-03-06	0	0
2018-03-07	0	0
2018-03-08	0.7	0
2018-03-09	0.8	0
2018-03-10	0.7	0
2018-03-11	0	0
2018-03-12	0	0
2018-03-13	0	0
2018-03-14	0	0
2018-03-15	0	0
2018-03-16	0	0
2018-03-17	0	0
2018-03-18	0	0
2018-03-19	0	0
2018-03-20	0	5
2018-03-21	0	4
2018-03-22	0	0
2018-03-23	0	0
2018-03-24	0	0
2018-03-25	0	0
2018-03-26	2	0
2018-03-27	0	0
2018-03-28	0	0
2018-03-29	0	0
2018-03-30	2	15
2018-03-31	1.6	0
2018-04-01	0	0
2018-04-02	2	0
2018-04-03	0	0
2018-04-04	0	0
2018-04-05	0	0
2018-04-06	0	0
2018-04-07	5.2	0
2018-04-08	0	0
2018-04-09	0	0
2018-04-10	0	0
2018-04-11	0	0
2018-04-12	1.6	0
2018-04-13	2	0
2018-04-14	1.5	0
2018-04-15	4	35.3
2018-04-16	0	1.2
2018-04-17	0	0
2018-04-18	0	0.8
2018-04-19	0	0
2018-04-20	0	0
2018-04-21	0	0
2018-04-22	0	0
2018-04-23	0	0
2018-04-24	0	0
2018-04-25	0	0
2018-04-26	0	0
2018-04-27	2	0
2018-04-28	5.2	0
2018-04-29	6	17.9
2018-04-30	3	1.2
2018-05-01	0	0
2018-05-02	0	16
2018-05-03	0	1
2018-05-04	0	2
2018-05-05	0	0
2018-05-06	0	0
2018-05-07	8.2	0
2018-05-08	0	5
2018-05-09	1.2	1
2018-05-10	4	1.2
2018-05-11	3	11
2018-05-12	1	6
2018-05-13	14.2	0
2018-05-14	5.5	0
2018-05-15	0	35.3
2018-05-16	0	12
2018-05-17	2.6	16
2018-05-18	0	0.8
2018-05-19	0	5
2018-05-20	0	0
2018-05-21	0	0
2018-05-22	0	0
2018-05-23	0	0
2018-05-24	0	0
2018-05-25	0	0
2018-05-26	5	0
2018-05-27	0	0
2018-05-28	0	0
2018-05-29	0	0
2018-05-30	0	12
2018-05-31	0	5.3
2018-06-01	0
2018-06-02	0
2018-06-03	0
2018-06-04	22.2
2018-06-05	0	4
2018-06-06	0	0
2018-06-07	0	1
2018-06-08	0.7	0
2018-06-09	0.8	0
2018-06-10	0.7	0
2018-06-11	0	0
2018-06-12	0	0
2018-06-13	0	3
2018-06-14	0	0
2018-06-15	0	0
2018-06-16	0	8
2018-06-17	0	0
2018-06-18	0	0
2018-06-19	0	0
2018-06-20	0	0
2018-06-21	0	2
2018-06-22	0	1.5
2018-06-23	0	0
2018-06-24	0	0
2018-06-25	0	22.6
2018-06-26	2	15.8
2018-06-27	0	0
2018-06-28	0	0
2018-06-29	0	0
2018-06-30	2	15.4
2018-07-01	0	0
2018-07-02	8	10.9
2018-07-03	4	4.3
2018-07-04	16	7.4
2018-07-05	0	3.8
2018-07-06	0	5.4
2018-07-07	13	0
2018-07-08	8.3	5.4
2018-07-09	17	8
2018-07-10	20	1
2018-07-11	0	6.6
2018-07-12	20.6	1.3
2018-07-13	8.6	25.6
2018-07-14	8.6	0
2018-07-15	20	23
2018-07-16	0	0
2018-07-17	13.2	5.2
2018-07-18	4.6	0
2018-07-19	4.3	13.2
2018-07-20	20	0
2018-07-21	8.4	10
2018-07-22	0	13.5
2018-07-23	15.8	9
2018-07-24	10	0
2018-07-25	20	3
2018-07-26	4.3	7.2
2018-07-27	3	0
2018-07-28	20.4	0
2018-07-29	14	4
2018-07-30	12	5
2018-07-31	6.8	0
2018-08-01	0	0
2018-08-02	2.3	21.3
2018-08-03	8.5	21.2
2018-08-04	3.1	35
2018-08-05	2	25.2
2018-08-06	6.9	6.8
2018-08-07	0	17.8
2018-08-08	2	6.8
2018-08-09	14.2	12.9
2018-08-10	4.8	0
2018-08-11	3.6	5.2
2018-08-12	21.6	8.9
2018-08-13	10.3	0
2018-08-14	0	7.5
2018-08-15	13.3	2
2018-08-16	2.3	12.3
2018-08-17	0	2.7
2018-08-18	4.3	11.2
2018-08-19	1.5	17.6
2018-08-20	2	1
2018-08-21	2.3	3.5
2018-08-22	4.1	13.7
2018-08-23	9.8	25
2018-08-24	4.5	1.3
2018-08-25	5.8	7.2
2018-08-26	6.2	15.2
2018-08-27	5.7	1.4
2018-08-28	6.4	9.6
2018-08-29	6.2	12.1
2018-08-30	0	5
2018-08-31	11.2	2
2018-09-01	11.5	4
2018-09-02	0	6
2018-09-03	9.4	7
2018-09-04	9.5
2018-09-05	0	8
2018-09-06	0	10
2018-09-07	2.5	10
2018-09-08	5	7
2018-09-09	3.3	18
2018-09-10	0	7
2018-09-11	2.5	5
2018-09-12	6.3	15
2018-09-13	4	20
2018-09-14	8.5	8.5
2018-09-15	2.4	20
2018-09-16	4	15
2018-09-17	0	21
2018-09-18	1.5	12
2018-09-19	6.4	6
2018-09-20	2	1
2018-09-21	0	1
2018-09-22	2.5	4
2018-09-23	0
2018-09-24	16.2
2018-09-25	0	8
2018-09-26	2.6	2.5
2018-09-27	2.2	7
2018-09-28	0	3
2018-09-29	0	18
2018-09-30	0.6
2018-10-01	1.3	18
2018-10-02	0	7
2018-10-03	0	0
2018-10-04	0	0
2018-10-05	0	2
2018-10-06	0	0
2018-10-07	0	0
2018-10-08	0	0
2018-10-09	0	1
2018-10-10	0	0
2018-10-11	8.2	0
2018-10-12	6.4	0
2018-10-13	0	0
2018-10-14	0	0
2018-10-15	0	0
2018-10-16	0	0
2018-10-17	0	1
2018-10-18	0	0
2018-10-19	0	0
2018-10-20	0	0
2018-10-21	21.3	0
2018-10-22	0	0
2018-10-23	0	0
2018-10-24	0	0
2018-10-25	0	0
2018-10-26	0	0
2018-10-27	0	0
2018-10-28	0	0
2018-10-29	0	0
2018-10-30	0	0
2018-10-31	0	0
2018-11-01	0	0
2018-11-02	0	0
2018-11-03	0	0
2018-11-04	0	0
2018-11-05	0	0
2018-11-06	0	0
2018-11-07	0	0
2018-11-08	0	0
2018-11-09	0	0
2018-11-10	0	0
2018-11-11	0	0
2018-11-12	0	0
2018-11-13	0	0
2018-11-14	0	0
2018-11-15	0	0
2018-11-16	0	0
2018-11-17	0	0
2018-11-18	0	0
2018-11-19	0	0
2018-11-20	0	0
2018-11-21	0	0
2018-11-22	0	0
2018-11-23	0	0
2018-11-24	3	0
2018-11-25	0	0
2018-11-26	0	0
2018-11-27	0	0
2018-11-28	0	0
2018-11-29	0	0
2018-11-30	2	0
2018-12-01	0	0
2018-12-02	0	0
2018-12-03	0	0
2018-12-04	0	0
2018-12-05	0	0
2018-12-06	0	0
2018-12-07	0	0
2018-12-08	0	0
2018-12-09	0	0
2018-12-10	0	0
2018-12-11	0	0
2018-12-12	0	0
2018-12-13	0	0
2018-12-14	0	0
2018-12-15	0	0
2018-12-16	0	0
2018-12-17	0	0
2018-12-18	0	0
2018-12-19	0	0
2018-12-20	0	0
2018-12-21	0	0
2018-12-22	0	0
2018-12-23	0	0
2018-12-24	0	0
2018-12-25	0	0
2018-12-26	0	0
2018-12-27	0	0
2018-12-28	0	0
2018-12-29	0	0
2018-12-30	0	0
2018-12-31	0	0
		2.99916

## Sheet: TMAX
DOM	2016	2017
2018-01-01	25	24
2018-01-02	24.5	25.5
2018-01-03	21	25
2018-01-04	23	25
2018-01-05	25	23.5
2018-01-06	22	22.5
2018-01-07	23	25.5
2018-01-08	25.5	25
2018-01-09	25	24
2018-01-10	25	23
2018-01-11	21	23.5
2018-01-12	22	22.5
2018-01-13	20	23.5
2018-01-14	19	25.5
2018-01-15	20.5	23.5
2018-01-16	21	25.5
2018-01-17	21	25
2018-01-18	20	26
2018-01-19	23	25.8
2018-01-20	23	26
2018-01-21	21	26
2018-01-22	23	27
2018-01-23	24	26
2018-01-24	23	27
2018-01-25	24.5	26
2018-01-26	24	25
2018-01-27	21	26.5
2018-01-28	20	27
2018-01-29	21	26.5
2018-01-30	19	26.5
2018-01-31	23	26.5
2018-02-01	23	26.5
2018-02-02	23.5	26.5
2018-02-03	24.5	27
2018-02-04	25	27
2018-02-05	25	26
2018-02-06	24	27
2018-02-07	24	26.5
2018-02-08	25	27
2018-02-09	25	27.5
2018-02-10	25	26.5
2018-02-11	25	26
2018-02-12	26	27
2018-02-13	27	28
2018-02-14	26	27.5
2018-02-15	27.5	20
2018-02-16	26	26
2018-02-17	26	25.5
2018-02-18	27	24.5
2018-02-19	27	22
2018-02-20	26	23.5
2018-02-21	25.5	25.5
2018-02-22	26	25.5
2018-02-23	27	25.5
2018-02-24	28	27
2018-02-25	26	25
2018-02-26	24	22.5
2018-02-27	25	22.5
2018-02-28	26.5	24.5
29-Feb	26.5
2018-03-01	24.5	24.5
2018-03-02	25.5	25
2018-03-03	26	25.5
2018-03-04	26	25.5
2018-03-05	24	26
2018-03-06	25	26.5
2018-03-07	23	24
2018-03-08	22	26.5
2018-03-09	25	26.5
2018-03-10	24.5	26.5
2018-03-11	21.5	26.5
2018-03-12	22	27
2018-03-13	24.5	27.5
2018-03-14	26	27.5
2018-03-15	26	27.5
2018-03-16	26	27.5
2018-03-17	26	27.5
2018-03-18	26	27.5
2018-03-19	26	28.5
2018-03-20	26	27.5
2018-03-21		26.5
2018-03-22	21.5	26
2018-03-23	22.5	25.5
2018-03-24	22	26
2018-03-25	22.5	27
2018-03-26	22.5	26
2018-03-27	22.5	24
2018-03-28	22.5	25.5
2018-03-29	21.5	27
2018-03-30	20.5	25.5
2018-03-31	23	24.5
2018-04-01	25	27
2018-04-02	24.5	26.5
2018-04-03	24	26
2018-04-04	25	27
2018-04-05	24	25.5
2018-04-06	25	26.5
2018-04-07	25	26
2018-04-08	25	26
2018-04-09	25	26
2018-04-10	25	26
2018-04-11	19.5	26.5
2018-04-12	23.5	26.5
2018-04-13	22.5	27.5
2018-04-14	24.5	27.5
2018-04-15	26.5	27.5
2018-04-16	25	27.5
2018-04-17	24.5	27.5
2018-04-18	24.5	27.5
2018-04-19	23.5	26.5
2018-04-20	25.5	26.5
2018-04-21	25.5	26.5
2018-04-22	25.5	26.5
2018-04-23	25	26.5
2018-04-24	25	27.5
2018-04-25	22.5	25
2018-04-26	22	24
2018-04-27	24	25.5
2018-04-28	25	23.5
2018-04-29	24	25.5
2018-04-30	25	22.5
2018-05-01	24.5	22.5
2018-05-02	25.5	24.5
2018-05-03	26	23.5
2018-05-04	26	25
2018-05-05	24	11
2018-05-06	25	24.5
2018-05-07	23	23
2018-05-08	22	23
2018-05-09	25	25.5
2018-05-10	24.5	26.5
2018-05-11	21.5	26.5
2018-05-12	22	24.5
2018-05-13	24.5	24
2018-05-14	26	22.5
2018-05-15	26	21.5
2018-05-16	26	22.5
2018-05-17	26	22.5
2018-05-18	26	25
2018-05-19	26	23.5
2018-05-20	26	23
2018-05-21	21.5	24
2018-05-22	22.5	25
2018-05-23	22	25.5
2018-05-24	22.5	22.5
2018-05-25	22.5	26
2018-05-26	22.5	22.5
2018-05-27	22.5	24
2018-05-28	21.5	24.5
2018-05-29	20.5	23.5
2018-05-30	23	23
2018-05-31	23.8833	23.5
2018-06-01	21.5
2018-06-02	21.5
2018-06-03	22
2018-06-04	22
2018-06-05	21.5	24.5
2018-06-06	22.5	23.5
2018-06-07	23	25
2018-06-08	20.5	25
2018-06-09	21	25
2018-06-10	21.5	25
2018-06-11	22.5	26.5
2018-06-12	22.5	23.5
2018-06-13	22	26
2018-06-14	18.5	26
2018-06-15	21.5	26.5
2018-06-16	16.5	25.5
2018-06-17	23.5	26.5
2018-06-18	22	24.5
2018-06-19	22.5	23.5
2018-06-20	21.5	25.5
2018-06-21	20.5	25.5
2018-06-22	21.5	26
2018-06-23	21.5	25.5
2018-06-24	24	20
2018-06-25	23.5	20.5
2018-06-26	22.5	21
2018-06-27	21.5	20.5
2018-06-28	22	22.5
2018-06-29	21.5	22.5
2018-06-30	20	22.5
2018-07-01	21.5	23
2018-07-02	21.5	22.5
2018-07-03	22	22
2018-07-04	22	24
2018-07-05	21.5	22
2018-07-06	22.5	20
2018-07-07	23	19.5
2018-07-08	20.5	19.5
2018-07-09	21	19
2018-07-10	21.5	21
2018-07-11	22.5	20
2018-07-12	22.5	22
2018-07-13	22	22
2018-07-14	18.5	22.5
2018-07-15	21.5	25
2018-07-16	16.5	25
2018-07-17	23.5	22
2018-07-18	22	22
2018-07-19	22.5	21.5
2018-07-20	21.5	22
2018-07-21	20.5	22
2018-07-22	21.5	22
2018-07-23	21.5	21.5
2018-07-24	24	22
2018-07-25	23.5	22
2018-07-26	22.5	23.5
2018-07-27	21.5	23.5
2018-07-28	22	23.5
2018-07-29	21.5	23.5
2018-07-30	20	22.5
2018-07-31	21	23.5
2018-08-01	21	21.5
2018-08-02	21	20.5
2018-08-03	21	20.5
2018-08-04	21	20.5
2018-08-05	21	21.5
2018-08-06	21.5	21.5
2018-08-07	19	21.5
2018-08-08	19.5	22.5
2018-08-09	21.5	20.5
2018-08-10	19	20
2018-08-11	19.5	20
2018-08-12	22.5	20
2018-08-13	22	20.5
2018-08-14	22.5	21.5
2018-08-15	22	20
2018-08-16	23.5	25
2018-08-17	19.5	23
2018-08-18	21.5	22
2018-08-19	21.5	21
2018-08-20	21.5	22
2018-08-21	21.5	22.5
2018-08-22	21.5	21.5
2018-08-23	21	21.5
2018-08-24	21	21.5
2018-08-25	21	21.5
2018-08-26	19	21.5
2018-08-27	21	22.5
2018-08-28	19	22.5
2018-08-29	19.5	21
2018-08-30	19	21.5
2018-08-31	22	21.5
2018-09-01	18.5	21.5
2018-09-02	18	22
2018-09-03	18.5	22
2018-09-04	22	21.5
2018-09-05	22.5	22
2018-09-06	21.5	21.5
2018-09-07	22.5	21.5
2018-09-08	22	21.5
2018-09-09	21	21
2018-09-10	21	21.5
2018-09-11	22	21
2018-09-12	22	23
2018-09-13	22	23
2018-09-14	21	20.5
2018-09-15	22	22
2018-09-16	23	20
2018-09-17	23	21
2018-09-18	23	21
2018-09-19	20	21.5
2018-09-20	20	21
2018-09-21	19.5	22
2018-09-22	19	22
2018-09-23	22	22
2018-09-24	22	22
2018-09-25	23.5	21
2018-09-26	23.5	22
2018-09-27	23.5	24
2018-09-28	23.5	23
2018-09-29	23.5	24
2018-09-30	24	24
2018-10-01	21	24
2018-10-02	22.5	24
2018-10-03	22.5	24
2018-10-04	23	24
2018-10-05	23	24.5
2018-10-06	23	24
2018-10-07	24	24
2018-10-08	24	24
2018-10-09	24	24
2018-10-10	24	23
2018-10-11	23.5	24
2018-10-12	24	24.5
2018-10-13	24	24
2018-10-14	24	24
2018-10-15	24	23
2018-10-16	24.5	23
2018-10-17	25	23.5
2018-10-18	24	23.5
2018-10-19	25	23
2018-10-20	25	24
2018-10-21	25	24.5
2018-10-22	24	24.5
2018-10-23	23.5	24
2018-10-24	22.5	24
2018-10-25	23	24.5
2018-10-26	23.5	24
2018-10-27	23.5	23
2018-10-28	23.5	24
2018-10-29	23.5	26.5
2018-10-30	23.5	23
2018-10-31	23.5	24
2018-11-01	24.5	24.5
2018-11-02	23.5	24.5
2018-11-03	24	25
2018-11-04	23.5	24
2018-11-05	25	22.5
2018-11-06	25	25.5
2018-11-07	23	20.5
2018-11-08	23	23.5
2018-11-09	20.5	24
2018-11-10	22.5	25
2018-11-11	23.5	25
2018-11-12	22.5	25
2018-11-13	22	24.5
2018-11-14	21.5	25
2018-11-15	22.5	25
2018-11-16	24	25
2018-11-17	23.5	24
2018-11-18	24	24
2018-11-19	24	24
2018-11-20	23.5	24
2018-11-21	25	24
2018-11-22	23	25
2018-11-23	25	25
2018-11-24	25.5	23.5
2018-11-25	26	23.5
2018-11-26	25	24
2018-11-27	25	23.5
2018-11-28	23	23.5
2018-11-29	20	24
2018-11-30	23	24
2018-12-01	24.5	24
2018-12-02	20.5	24.5
2018-12-03	22.5	24
2018-12-04	24	24
2018-12-05	24	23.5
2018-12-06	24	25
2018-12-07	24	24
2018-12-08	24	23
2018-12-09	24	23
2018-12-10	24.5	23
2018-12-11	24	22.5
2018-12-12	23.5	23
2018-12-13	24.5	23.5
2018-12-14	24.5	25
2018-12-15	24.5	25
2018-12-16	25.5	25
2018-12-17	25	24
2018-12-18	25	23.5
2018-12-19	25.5	23.5
2018-12-20	24	23.5
2018-12-21	23	23
2018-12-22	23.5	22.5
2018-12-23	24	23
2018-12-24	24.5	24
2018-12-25	24	24.5
2018-12-26	25	24
2018-12-27	25	24
2018-12-28	24	24
2018-12-29	23	25
2018-12-30	20.5	25
2018-12-31	25	24

## Sheet: TMIN
DOM	2016	2017
2018-01-01	4.5	-2.5
2018-01-02	5	-2.5
2018-01-03	4	-2
2018-01-04	7.5	-4.5
2018-01-05	4.5	-5
2018-01-06	9.5	-5
2018-01-07	8	-5.5
2018-01-08	7.5	0.5
2018-01-09	6	-5.5
2018-01-10	6	-2.5
2018-01-11	6	-4
2018-01-12	4.5	-4.5
2018-01-13	4	-4
2018-01-14	4.5	-3.5
2018-01-15	5	-1
2018-01-16	5	0
2018-01-17	8	-1.5
2018-01-18	6	0.5
2018-01-19	5.5	1
2018-01-20	5	1.5
2018-01-21	7	1.5
2018-01-22	5	2
2018-01-23	5	1.5
2018-01-24	5	2
2018-01-25	2	1.5
2018-01-26	2.5	1.5
2018-01-27	9	2
2018-01-28	8	5
2018-01-29	7	4.5
2018-01-30	6	4.5
2018-01-31	7	4
2018-02-01	6	3.5
2018-02-02	10	2
2018-02-03	3.5	2
2018-02-04	3	2.5
2018-02-05	3	4
2018-02-06	2	1
2018-02-07	5	5
2018-02-08	5	4.5
2018-02-09	5	5.5
2018-02-10	6	4
2018-02-11	6	6
2018-02-12	6.5	5.5
2018-02-13	6	6.5
2018-02-14	6.5	6.5
2018-02-15	7.5	11
2018-02-16	5	9.5
2018-02-17	9	6.5
2018-02-18	8.56	10
2018-02-19	9.5	5
2018-02-20	6	2.5
2018-02-21	5	2.5
2018-02-22	5.5	3.5
2018-02-23	6.5	3
2018-02-24	5.5	4.5
2018-02-25	6.5	5
2018-02-26	7	3
2018-02-27	6	12
2018-02-28	6	8
29-Feb	6.5
2018-03-01	4.5	8
2018-03-02	7	6.5
2018-03-03	6.5	7.5
2018-03-04	6.5	7
2018-03-05	5	6.5
2018-03-06	9	6.5
2018-03-07	9	6.5
2018-03-08	9	6
2018-03-09	8	7.5
2018-03-10	10	10
2018-03-11	8	5.5
2018-03-12	8	8
2018-03-13	7	7.5
2018-03-14	7	4.5
2018-03-15	7	2
2018-03-16	6	4.5
2018-03-17	7	7
2018-03-18	6.5	7.5
2018-03-19	7	10
2018-03-20	8	8.5
2018-03-21	8	11
2018-03-22	8.5	8.5
2018-03-23	12	11.5
2018-03-24	9.5	10.5
2018-03-25	11.5	10
2018-03-26	10.5	10.5
2018-03-27	10	10
2018-03-28	8	11
2018-03-29	8.5	11
2018-03-30	8.5	12
2018-03-31	8	11.5
2018-04-01	12	8.5
2018-04-02	9	8
2018-04-03	11.5	8.5
2018-04-04	9.5	7.5
2018-04-05	8.5	5.5
2018-04-06	11	5.5
2018-04-07	12.5	9.5
2018-04-08	10.5	8
2018-04-09	8	8
2018-04-10	11	7.5
2018-04-11	9.5	10.5
2018-04-12	10	9.5
2018-04-13	9	10.5
2018-04-14	11.5	10.5
2018-04-15	11	9.5
2018-04-16	11	10.5
2018-04-17	12	9.5
2018-04-18	11	7.5
2018-04-19	11.5	7.5
2018-04-20	11.5	8
2018-04-21	13	9
2018-04-22	13	8.5
2018-04-23	10	7.5
2018-04-24	14	6.5
2018-04-25	105	6
2018-04-26	11.5	5.5
2018-04-27	13.5	7.5
2018-04-28	12	9
2018-04-29	12	8.5
2018-04-30	11.5	10
2018-05-01	11	9.5
2018-05-02	10	11
2018-05-03	12	8.5
2018-05-04	9.5	11
2018-05-05	9.5	9
2018-05-06	11	9
2018-05-07	10.5	10.5
2018-05-08	12	11
2018-05-09	11	8.5
2018-05-10	12.5	9
2018-05-11	12.5	8.5
2018-05-12	11.5	8.5
2018-05-13	4	9
2018-05-14	9.5	8.5
2018-05-15	8	12
2018-05-16	9	12
2018-05-17	12	12.5
2018-05-18	7.5	11
2018-05-19	8.5	10.5
2018-05-20	7.5	8.5
2018-05-21	8.5	9.5
2018-05-22	7.58	8.5
2018-05-23	8	11
2018-05-24	7.5	10
2018-05-25	10	7
2018-05-26	10	8
2018-05-27	8.5	11.5
2018-05-28	7.5	11.5
2018-05-29	7.5	12.5
2018-05-30	9.5	11
2018-05-31	7.5	12
2018-06-01	4.5
2018-06-02	7
2018-06-03	6.5
2018-06-04	6.5
2018-06-05	5	7
2018-06-06	9	8.5
2018-06-07	9	8
2018-06-08	9	8
2018-06-09	8	8.5
2018-06-10	10	10.5
2018-06-11	8	9
2018-06-12	8	10
2018-06-13	7	10.5
2018-06-14	7	9
2018-06-15	7	7
2018-06-16	6	7
2018-06-17	7	8.5
2018-06-18	6.5	9
2018-06-19	7	8.5
2018-06-20	8	10
2018-06-21	8	10
2018-06-22	8.5	11
2018-06-23	12	9
2018-06-24	9.5	8
2018-06-25	11.5	7.5
2018-06-26	10.5	8
2018-06-27	10	10.5
2018-06-28	8	10.5
2018-06-29	8.5	11
2018-06-30	8.5	8.5
2018-07-01	7.5	8
2018-07-02	5.5	12.5
2018-07-03	4.5	11.5
2018-07-04	5.5	8.5
2018-07-05	9.5	8.5
2018-07-06	9.5	8
2018-07-07	7.5	7.5
2018-07-08	11.5	11.5
2018-07-09	7.5	6.5
2018-07-10		7
2018-07-11	8	7
2018-07-12	7.5	9
2018-07-13	6.5	10
2018-07-14	6	9
2018-07-15	4.5	11
2018-07-16	5.5	7.5
2018-07-17	5.5	10.5
2018-07-18	10	9.5
2018-07-19	7.5	12
2018-07-20	11.5	12
2018-07-21	10.5	11
2018-07-22	8.5	11.5
2018-07-23	8.5	10.5
2018-07-24	6.5	10
2018-07-25	6.5	11.5
2018-07-26	8	11
2018-07-27	7.5	11.5
2018-07-28	8.5	10
2018-07-29	8.5	10
2018-07-30	9.5	12.5
2018-07-31	11.5	12.5
2018-08-01	6.5	10.5
2018-08-02	5	10
2018-08-03	3.5	10
2018-08-04	4.5	10.5
2018-08-05	3.5	9.5
2018-08-06	4	8
2018-08-07	5	11.5
2018-08-08	8	11
2018-08-09	11	8.5
2018-08-10	11	8.5
2018-08-11	12	11
2018-08-12	10	10
2018-08-13	10.5	10
2018-08-14	10.5	10.5
2018-08-15	9.5	10.5
2018-08-16	7.5	11
2018-08-17	9.5	8.5
2018-08-18	9	11
2018-08-19	9	10.5
2018-08-20	8	10
2018-08-21	8.5	10
2018-08-22	9.5	9.5
2018-08-23	7.5	11
2018-08-24	9.5	9
2018-08-25	8.5	9
2018-08-26	8	10.5
2018-08-27	9.5	11
2018-08-28	7	11.5
2018-08-29	9.5	11
2018-08-30	11	12.5
2018-08-31	9.5	9
2018-09-01	8.5	9.5
2018-09-02	11	9.8
2018-09-03	10.5	9
2018-09-04	11	10.5
2018-09-05	8.5	10.5
2018-09-06	8.5	9.5
2018-09-07	7	9.5
2018-09-08	8.5	8
2018-09-09	8	10
2018-09-10	8	9.5
2018-09-11	9	10.5
2018-09-12	8	7
2018-09-13	9	6.5
2018-09-14	8	6.5
2018-09-15	8	11
2018-09-16	9	12.5
2018-09-17	10	7.5
2018-09-18	9	5.5
2018-09-19	9.5	12.5
2018-09-20	8.5	10.5
2018-09-21	9	8
2018-09-22	6.5	10
2018-09-23	7	8.5
2018-09-24	6	8.5
2018-09-25	7	8.5
2018-09-26	8	10
2018-09-27	8.5	7.5
2018-09-28	8.5	7.5
2018-09-29	9	7.5
2018-09-30	7.5	6.5
2018-10-01	7.5	7.5
2018-10-02	6	11
2018-10-03	6	10.5
2018-10-04	6	7.5
2018-10-05	6	5.5
2018-10-06	6	7.5
2018-10-07	5.5	7.5
2018-10-08	4.5	6.5
2018-10-09	5	7.5
2018-10-10	5	8
2018-10-11	5	7.5
2018-10-12	5	7.5
2018-10-13	5	7.5
2018-10-14	5	8.5
2018-10-15	5	10.5
2018-10-16	5	10.5
2018-10-17	4	9.5
2018-10-18	4.5	8.5
2018-10-19	5	11
2018-10-20	5	10
2018-10-21	4.5	9.5
2018-10-22	4.5	7
2018-10-23	3.5	10
2018-10-24	4	7
2018-10-25	4.5	5
2018-10-26	4.5	6.5
2018-10-27	4	10
2018-10-28	3.5	6
2018-10-29	3.5	6
2018-10-30	3	9.5
2018-10-31	3.5	9.5
2018-11-01	-1.5	5.5
2018-11-02	1.5	4.5
2018-11-03	1	7
2018-11-04	1	6
2018-11-05	1	6
2018-11-06	3	6
2018-11-07	4	5.5
2018-11-08	4	4
2018-11-09	3.5	3
2018-11-10	2.5	4
2018-11-11	0.5	3
2018-11-12	-2	3
2018-11-13	-3	3
2018-11-14	-3.5	0.5
2018-11-15	0.5	1
2018-11-16	0.5	1
2018-11-17	2.5	1
2018-11-18	3	1
2018-11-19	2.5	1
2018-11-20	4	-0.5
2018-11-21	3	1
2018-11-22	2.5	1
2018-11-23	2.5	3
2018-11-24	8.5	3.5
2018-11-25	5	4.5
2018-11-26	11.5	3.5
2018-11-27	5.5	1
2018-11-28	3	3.5
2018-11-29	6	3.5
2018-11-30	4	3
2018-12-01	2.5	3
2018-12-02	8.5	1.5
2018-12-03	3	0.5
2018-12-04	0.5	0
2018-12-05	-3	0.6
2018-12-06	-2.5	2
2018-12-07	0.5	2
2018-12-08	1.5	3
2018-12-09	2	1.5
2018-12-10	3	1
2018-12-11	4	-1
2018-12-12	4	1
2018-12-13	2	-2
2018-12-14	2.5	0
2018-12-15	3	0.5
2018-12-16	2.5	2.5
2018-12-17	4	2
2018-12-18	3	2
2018-12-19	-1.5	2
2018-12-20	0.5	0.5
2018-12-21	2.5	-2
2018-12-22	2	-2.5
2018-12-23	3.5	-2.5
2018-12-24	0.5	-2.5
2018-12-25	1.5	0
2018-12-26	1	1
2018-12-27	1.5	1
2018-12-28	-1.5	2
2018-12-29	-1	4
2018-12-30	0	4
2018-12-31	0	4
