# Supplementary material for: Genetic variability studies for tuber yield and yield attributes in Ethiopian released potato (Solanum tuberosum L.) varieties
Source: PeerJ. 2022 Feb 10;10:e12860. doi: 10.7717/peerj.12860 (PMC8841037; doi:10.7717/peerj.12860)
Supplement: Supplemental Information 2 [file peerj-10-12860-s002.xlsx]

## Sheet: Sheet1
Loc	Ent	Rep	DF	DM	NLp	PH	SN	AvTN	AvTW	MTY	UMTY	TTY	SG	DMC	SC	TSY
1	Nech	1	60.5	85	42	67.7	7.2	5.29412	70.2	8.55333	5.35556	14.9089	1.06868	18.25	11.5504	1.72204
1	beda	1	62	85	42	67.7	4.8	12.2778	61.8281	36.8148	6.19259	43.0074	1.0767	20	13.1471	5.65423
1	gabi	1	65	85	43.2	72.9	5.8	12.9474	69.187	33.9228	5.35789	39.2807	1.08472	21.75	14.7438	5.79146
1	bele	1	58	95	53.8	82.3	6.2	11.25	79.9022	35.7267	5.89111	41.6178	1.10191	25.5	18.1652	7.55997
1	jale	1	60	87	50.2	60.3	4.6	10.6471	60.1602	25.2418	5.98562	28.2275	1.07556	19.75	12.919	3.6467
1	guas	1	62	97	32	54.5	3.6	6.8125	68.1835	17.6361	3.00833	20.6444	1.08472	21.75	14.7438	3.04377
1	gude	1	59	85	64.8	88.7	8.5	17	54.2632	33.083	7.38363	41.4667	1.08358	21.5	14.5157	6.01917
1	gera	1	58	99	48.8	79.3	4.4	9.68421	70.0489	31.6655	1.92749	33.593	1.07556	19.75	12.919	4.33988
1	zeme	1	57	101	47.8	77.2	7.7	12.1053	53.3783	21.9813	5.73684	27.7181	1.08243	21.25	14.2876	3.96025
1	wech	1	61	83	37.2	54.6	5.8	13.1765	43.3438	15.0928	4.15817	18.251	1.09045	23	15.8843	2.89903
1	gore	1	54	99	58.6	94.6	6.6	10.9	75.211	33.7067	3.39556	37.1022	1.08243	21.25	14.2876	5.30101
1	chir	1	59	83	30.4	72.5	4.5	13.6471	56.6853	29.4928	3.88889	33.3817	1.07785	20.25	13.3752	4.46487
1	awas	1	62	83	32.6	57.8	3.6	12.7895	57.4403	26.8632	7.76374	34.6269	1.08702	22.25	15.2	5.26328
1	bubu	1	64.7	104	46.8	79.7	7.3	13.2	60.6098	30.52	5.03778	35.5578	1.09045	23	15.8843	5.64809
1	zeng	1	59	105	49.4	70.5	3.5	11.5882	38.7513	14.1386	4.81961	18.9582	1.0767	20	13.1471	2.49245
1	dagi	1	62	103	44.8	70.5	4.9	8.55556	63.461	19.7679	4.84444	25.6123	1.07327	19.25	12.4628	3.19202
1	shen	1	61	97.8	65	83.7	8.9	12.4211	64.4619	28.9918	5.59415	35.586	1.08358	21.5	14.5157	5.16555
1	Al624	1	61	83	57.4	73.8	6.4	16.2	49.8364	25.2889	4.82889	31.1178	1.0767	20	13.1471	4.09108
1	mena	1	51	99	33.2	54.4	3	11.9375	53.6754	14.4889	2.02876	16.5176	1.05035	14.25	7.90085	1.30504
1	mara	1	56.2	105	28.6	40.8	2.2	17.15	19.5598	24.7619	5.10159	29.8635	1.0641	17.25	10.638	3.17689
1	chal	1	55.1	106	46.2	72.4	4	12.4	61.6815	29.9244	4.06889	33.9933	1.08472	21.75	14.7438	5.0119
1	jale	2	62	101	52.2	59.5	4.8	13.5	55.4339	26.7556	5.40952	35.1651	1.07556	19.75	12.919	4.54298
1	chal	2	57	109	41.2	70.5	3.8	10.8421	63.733	25.6655	4.98129	30.6468	1.08129	21	14.0595	4.30878
1	gore	2	50	102	57.6	90.3	5.3	8.15	87.5399	28.38	3.32889	31.7089	1.0767	20	13.1471	4.1688
1	bele	2	55	109	49	84.8	5.1	10	85.9632	33.6094	4.12865	37.738	1.09504	24	16.7967	6.33872
1	mena	2	51	105	40.2	57.6	3.9	10.6471	50.442	14.8127	2.10476	16.9175	1.05035	14.25	7.90085	1.33662
1	gabi	2	62	88	42.8	71.6	6.7	15.7	57.4331	33.48	5.2	38.68	1.07556	19.75	12.919	4.99707
1	awas	2	62	83.5	36.8	62.9	3	14.4375	50.1515	24.6039	7.33072	31.9346	1.07212	19	12.2347	3.90711
1	Nech	2	64	90	53	72.2	5.2	6.42857	59.2111	6.72281	5.26199	12.9848	1.06983	18.5	11.7785	1.52942
1	gera	2	60	100	43.4	81.6	4.3	12.4737	59.0338	30.6409	2.08655	32.7275	1.08243	21.25	14.2876	4.67597
1	chir	2	58	85	37.8	71.3	4.1	12.0556	56.8894	23.6178	3.81556	27.4333	1.07327	19.25	12.4628	3.41896
1	Al624	2	59	89	51.6	72.4	5.2	13	54.4656	28.7322	4.20468	31.9368	1.07899	20.5	13.6033	4.34446
1	dagi	2	59	109	42.6	73.2	4.5	8.73684	64.7349	21.6515	3.78363	24.4351	1.0767	20	13.1471	3.2125
1	beda	2	62	90	53	72.2	4.4	15.15	53.2409	31.1956	5.65333	36.8489	1.06983	18.5	11.7785	4.34025
1	guas	2	63	100	38.4	54.3	3.4	9.13333	59.7591	15.451	2.57516	18.0261	1.07556	19.75	12.919	2.3288
1	bubu	2	66	108	45.4	74.8	6.4	12.55	61.3347	28.8889	5.32222	34.2111	1.08358	21.5	14.5157	4.96598
1	zeng	2	61	109	43	73.2	3.1	9.52941	39.7222	12.6797	4.14379	16.8235	1.0767	20	13.1471	2.21181
1	wech	2	62	85	32.8	42.2	4.5	11.6	39.3103	14.0494	4.8642	18.9136	1.07785	20.25	13.3752	2.52973
1	zeme	2	68	100	47.8	76.7	7	11.55	51.4113	21.9222	3.60222	25.5244	1.08358	21.5	14.5157	3.70505
1	mara	2	58	107	25.8	39.1	1.9	13.5263	21.5992	20.5752	3.63399	24.2092	1.0767	20	13.1471	3.1828
1	gude	2	59	87	63.2	76.8	7.4	14.7	52.2789	27.0222	6.24444	33.2667	1.08243	21.25	14.2876	4.753
1	shen	2	62	100	71.8	83.3	10.3	13.3889	62.4066	33.8889	4.24691	37.1358	1.07327	19.25	12.4628	4.62816
1	gabi	3	56	85	44.2	77	6.7	15.5	62.5269	36.2469	4.57778	40.8247	1.08816	22.5	15.4281	6.29846
1	dagi	3	58.6	89	50	69.5	4.9	8.4375	59.6667	19.3194	3.05556	22.375	1.07899	20.5	13.6033	3.04374
1	bele	3	60	109	54.6	94.9	5.9	13.05	76.1188	38.2711	3.76667	42.0378	1.08472	21.75	14.7438	6.19796
1	beda	3	64	87	45.8	75.2	4	17.375	56.1187	34.5722	4.875	39.4472	1.06754	18	11.3223	4.46634
1	awas	3	60	80	35.4	63.5	3.4	13.0588	55.9144	25.1111	5.70278	30.8139	1.06983	18.5	11.7785	3.62942
1	gore	3	60	104	50.8	98.3	5.6	9.125	75	27.1944	3	30.1944	1.0767	20	13.1471	3.96969
1	Nech	3	66	94	45.8	75.2	5.5	5.25	58.75	9.27485	5.52047	12.7953	1.07097	18.75	12.0066	1.53628
1	zeme	3	64	107	57.4	80.5	7.4	12.15	58.9095	28.3889	3.97778	32.3667	1.08358	21.5	14.5157	4.69824
1	zeng	3	62	105	50.4	69.5	3.2	8.66667	38.5897	11.7037	3.17284	14.8765	1.07556	19.75	12.919	1.9219
1	gude	3	64	86	60.6	82	8	14.95	59.8662	35.5556	5.22222	39.7778	1.08358	21.5	14.5157	5.77402
1	bubu	3	66	109	51.4	87.7	7.8	15.6	56.875	33.1444	6.28889	39.4333	1.08587	22	14.9719	5.90391
1	mara	3	57.3	108	30.8	45.5	1.9	13.0526	22.0565	26.8105	3.9281	30.7386	1.07785	20.25	13.3752	4.11134
1	jale	3	51	89	45.8	68.1	4.9	12.1579	56.0173	25.883	4.38596	30.269	1.08931	22.75	15.6562	4.73897
1	mena	3	51	103	36	52.9	2.7	12.3529	54.1667	12.3472	1.36111	13.7083	1.05837	16	9.49754	1.30195
1	chir	3	65	89	36.6	79.4	4.4	13.7059	55.5579	29.3856	2.84314	32.2288	1.06983	18.5	11.7785	3.79607
1	Al624	3	62	87	47.8	79.4	5.1	10.6316	60.8069	27.4386	4.12865	31.5673	1.08816	22.5	15.4281	4.87022
1	gera	3	56	97	46.4	80.7	4.8	12.7647	66.3825	35.5686	2.0915	37.6601	1.07441	19.5	12.6909	4.77941
1	chal	3	58	104	46.4	83.7	3.9	10.6471	60.2762	25.3856	3.82353	29.2092	1.08472	21.75	14.7438	4.30653
1	shen	3	60	105	63.2	79.7	8.7	13.5	59.7407	29.3333	6.51111	35.8444	1.08472	21.75	14.7438	5.28483
1	wech	3	62	88	42.2	54.5	4.6	9.57895	50.4725	20.3922	5.0915	26.4837	1.07327	19.25	12.4628	3.30061
1	guas	3	63.2	102	41.8	61.4	3.2	7.89474	63.8	20.7059	3.71242	24.4183	1.07212	19	12.2347	2.98751
2	Nech	1	60	99	36.2	42.9	2.8	13.6	21.1471	6.66	6.12222	12.7822	1.08816	22.5	15.4281	1.97205
2	beda	1	58	97	35.6	49.3	3.6	17.833	30.5839	17.898	5.73086	23.6289	1.09618	24.25	17.0248	4.02276
2	gabi	1	60	102	28.4	49.4	5	11.9474	43.0044	18.1918	4.64327	22.8351	1.0916	23.25	16.1124	3.67927
2	bele	1	58	102	31.2	55.7	3.4	10.8889	47.2368	24.069	2.99259	27.0616	1.1042	26	18.6214	5.03926
2	jale	1	60	107	37.8	47.2	4.5	11.15	29.7399	10.813	3.99	14.803	1.09274	23.5	16.3405	2.41888
2	guas	1	62	104	38.8	37.3	3	6.769	58.3068	13.176	2.246	15.422	1.09618	24.25	17.0248	2.62556
2	gude	1	59	106	39.4	67.1	5.5	13.2105	43.9124	19.48	5.366	24.846	1.09045	23	15.8843	3.9466
2	gera	1	58	104	42.4	68.8	4.5	11.6	64.2026	20.742	3.468	24.21	1.07899	20.5	13.6033	3.29336
2	zeme	1	57	105	29.8	63.9	3.7	11.2105	24.8662	22.1988	2.58012	24.7789	1.09045	23	15.8843	3.93595
2	wech	1	61	101	32.4	44.1	4.4	9.9375	31.9245	10.9639	3.13611	14.1	1.08358	21.5	14.5157	2.04671
2	gore	1	53	99	32.8	60.3	4.4	9.35	57.9572	25.0889	3.15111	28.24	1.09618	24.25	17.0248	4.80779
2	chir	1	59	105	25.4	61.9	3.7	13.35	47.1648	23.0311	2.953	25.9841	1.08129	21	14.0595	3.65323
2	awas	1	62	99	32.4	42.8	3.4	9.17647	54.7308	21.8824	3.733	25.6154	1.09504	24	16.7967	4.30252
2	bubu	1	64	103	30.6	53.5	4.5	8.95	56.1061	19.4422	2.87556	22.3178	1.09389	23.75	16.5686	3.69773
2	zeng	1	59	101	44.2	56.6	4.5	8.25	35.8909	10.1733	2.98667	13.16	1.0916	23.25	16.1124	2.12039
2	dagi	1	62	104	42.4	45.2	3.7	7.77778	76.6	19.3951	3.62716	23.0222	1.09962	25	17.709	4.07702
2	shen	1	61	107	36	56.2	5.2	13.75	38.9091	17.86	5.91778	23.7778	1.09389	23.75	16.5686	3.93964
2	Al624	1	61	97	37	44.6	4.2	11.05	50.9683	19.168	2.94	22.108	1.09733	24.5	17.2529	3.81426
2	mena	1	51	98	20.2	22	1.6	5.94444	58.7944	13.5481	1.98519	15.5333	1.06066	16.5	9.95373	1.54615
2	mara	1	55	106	42	45.1	3.9	6.53846	41.0678	9.921	1.43932	11.3603	1.08587	22	14.9719	1.70085
2	chal	1	54	109	34.4	44.5	3.5	10.15	47.4039	18.815	2.3	21.115	1.10649	26.5	19.0776	4.02824
2	jale	2	62	99	42.8	39	4.5	12.85	29.5837	12.2578	4.63778	16.8956	1.09962	25	17.709	2.99204
2	chal	2	57	109	40.8	42.2	3.3	9.47059	47.9627	18.8026	1.38562	20.1882	1.09962	25	17.709	3.57514
2	gore	2	50	101	44.6	50.5	3.6	11.3	57.615	25.6467	3.28889	28.9356	1.09847	24.75	17.4809	5.05821
2	bele	2	51	104	31.2	45.3	3.3	10.8333	50.7457	22.1222	2.928	25.0502	1.11681	28.75	21.1305	5.29324
2	mena	2	51	96	28	22.2	1.9	5.66667	57.1569	13.4148	2.214	15.6288	1.06295	17	10.4099	1.62695
2	gabi	2	62	102	25.8	49.1	4	13	39.351	20.3611	2.375	22.7361	1.09847	24.75	17.4809	3.97449
2	awas	2	62	101	34.2	41	3.4	13.05	50.0268	23.56	3.517	27.077	1.09504	24	16.7967	4.54803
2	Nech	2	64	98	30	42.7	2.6	16	20.3309	9.15556	5.30196	14.4575	1.08587	22	14.9719	2.16456
2	gera	2	60	102	47.2	57.6	3.9	8.57895	60.1411	21.0433	2.098	23.1413	1.08702	22.25	15.2	3.51747
2	chir	2	58	106	33.4	48.7	4.3	13.2222	47.8319	24.4296	3.67901	28.1086	1.0916	23.25	16.1124	4.52897
2	Al624	2	59	99	44.4	54.9	3.1	8.6	51.4884	22.408	3.13778	25.5458	1.09733	24.5	17.2529	4.40738
2	dagi	2	59	106	33.6	45	3.3	8.42857	69.5763	20.005	3.2	23.205	1.0916	23.25	16.1124	3.73887
2	beda	2	62	94	36.4	40.2	3.5	14.125	32.9779	17.791	4.57778	22.3688	1.08587	22	14.9719	3.34903
2	guas	2	60	104	31.8	31.2	3.1	6.83333	49.7927	11.5741	2.02963	13.6037	1.11108	27.5	19.99	2.71938
2	bubu	2	65	103	31	55.8	5.1	12.8421	39.582	17.8222	3.833	21.6552	1.09733	24.5	17.2529	3.73614
2	zeng	2	55	99	38.4	57.7	2.8	11.8	35.1808	14.7763	3.67407	18.4504	1.09618	24.25	17.0248	3.14113
2	wech	2	62	100	30.8	35.4	3.5	10.7059	29.4725	10.6902	3.33333	14.0235	1.08816	22.5	15.4281	2.16356
2	zeme	2	66	95	34.8	53.1	4.9	13.2353	39.7422	19.39	3.059	22.449	1.09045	23	15.8843	3.56586
2	mara	2	58	110	37.2	40.8	3.2	7.66667	53.8621	10.348	2.44444	12.7924	1.08587	22	14.9719	1.91527
2	gude	2	59	108	34	57.8	4.9	16.15	35.678	20.7156	4.89333	25.6089	1.09618	24.25	17.0248	4.35985
2	shen	2	62	108	41.8	56.8	5.6	13.8	37.5145	17.1333	5.87556	23.0089	1.09618	24.25	17.0248	3.91721
2	gabi	3	54	100	30.8	42.9	3.9	11.2308	50.4315	21.3094	3.86325	25.1726	1.09045	23	15.8843	3.99849
2	dagi	3	58	101	35.2	38.8	3.1	6.5	85.9231	19.08	2.538	21.618	1.09618	24.25	17.0248	3.68041
2	bele	3	64	107	39	40.6	2.3	9.11765	49.7871	20.679	2.89412	23.5731	1.10649	26.5	19.0776	4.49719
2	beda	3	63	99	34.2	39.6	4.4	17.5	32.184	15.506	3.26222	18.7682	1.08129	21	14.0595	2.63872
2	awas	3	60	99	25.6	36.1	3.3	10.4667	56.8408	20.823	2.28148	23.1045	1.09504	24	16.7967	3.88078
2	gore	3	61	96	35	50.9	3.1	8.15	47.9693	24.14	2.32889	26.4689	1.10076	25.25	17.9371	4.74776
2	Nech	3	65	97	37	52.7	3.9	17.4737	19.4277	10.0094	5.07836	15.0877	1.08702	22.25	15.2	2.29333
2	zeme	3	63	94	34.6	48.4	3.3	8.25	36.4727	19.428	2.52222	21.9502	1.09618	24.25	17.0248	3.73697
2	zeng	3	63	102	41	51.6	2.4	7.05556	31.1417	10.879	2.343	13.222	1.09504	24	16.7967	2.22085
2	gude	3	64	104	41.2	57.4	4.4	11.7	45.8205	21.8178	4.231	26.0488	1.10191	25.5	18.1652	4.73182
2	bubu	3	66	104	38	49.5	4	8.3	52.9217	18.2533	2.157	20.4103	1.10191	25.5	18.1652	3.70759
2	mara	3	57	112	42	40.9	3.4	5.54545	55.3934	11.4545	2.19798	13.6525	1.07785	20.25	13.3752	1.82605
2	jale	3	51	100	43.8	43.2	3.6	8.68421	36.7939	13.7591	3.876	17.6351	1.1042	26	18.6214	3.2839
2	mena	3	51	101	25.4	24.3	1.6	6.125	48	15	3	18	1.05952	16.25	9.72563	1.75061
2	chir	3	65	102	25.4	49.7	3.7	12.6667	48.1117	19.2234	1.9345	21.1579	1.11108	27.5	19.99	4.22947
2	Al624	3	62	105	38.4	53.8	3.1	9.89474	48.1117	20.626	3.097	23.723	1.08358	21.5	14.5157	3.44356
2	gera	3	56	106	46	61.2	4.1	9.05	64.663	23.5356	2.47333	26.0089	1.08702	22.25	15.2	3.95334
2	chal	3	58	106	39.8	55.4	3.5	10.15	55.2463	21.602	1.13111	22.7331	1.10306	25.75	18.3933	4.18138
2	shen	3	60	102	33.8	55.5	4.8	12.2778	37.6923	17.4395	4.609	22.0485	1.10076	25.25	17.9371	3.95487
2	wech	3	62	103	39.6	39.2	4.4	13	19.4731	8.38222	2.86889	11.2511	1.07556	19.75	12.919	1.45353
2	guas	3	63	99	25	27.2	2.6	6.61538	50.907	12.2701	2.252	14.5221	1.09847	24.75	17.4809	2.5386
